# Supplementary material for: Supercritical extraction as an effective first-step in a maize stover biorefinery
Source: Royal Society of Chemistry journal article supplement (doi:10.1039/c5ra07485a), 2015-01-01
Supplement: c5ra07485a1.xlsx [file c5ra07485a1.xlsx]

## Sheet: Maize scCo2-extracted
				1. CO2 Extraction General Maize
			wax yield from CO2 extraction (%)	0.9
			kg wax:	0.018
			kg biomass PT in:	1.982
		PT in	kg	2. PRETREATMENT scCO2-Wax extraction from Maize stover
		Biomass	2	H20_in (kg)	Dry ash-free biomass total_in (kg)	Hemicellulose kg	Cellulose kg	Lignin kg
		Water	20	20.2426	1.6614	0.6102	0.5732	0.478
General Maize composition:
Moisture (%):	12.13
Lignin Content (%):	23.9
Hemicellulose (%):	30.51			kg C6 out (PT liquor)	kg C5 out (PT liquor)
Cellulose (%):	28.66			0.106982	0.098507
Ash (%):	4.8
				Total sugars in PT liquor (kg):	0.205489
		PT out
		Liquor (wet)	17.2	Solid fraction mass balances (which is also the hydrolysis feed)	kg
		Solids (wet)	4.8	Cellulose	0.466218
				Hemicellulose	0.511693
				Lignin	0.478
				Total unconverted biomass (dry)	1.45591
				water	3.24809
				Ash	0.096
				TOTAL	4.8
				3. HYDROLYSIS General Maize_Wax extraction
			Yield as reported by Processum is	0.04 kg sugars/kg as received feed. Dry matter is 80% of feed.
			Assumed	0.025kg C6 /kg and 0.015 kg C5/kg (as received feed), 0.031kg C6 /kg and 0.019 kg C5/kg (dry feed)
			Hydrolysis_out (dry)	kg
			C6 sugars	0.0454972
			C5 sugars	0.0272983
			Cellulose	0.420721
			Hemicellulose	0.484395
			Lignin	0.478
			TOTAL	1.45591
				4. FERMENTATION General Maize_Wax extraction
			Yield as reported by Processum is	0.93-1 kg ethanol/kg fermentable sugars
			Assumed	0.965 kg ethanol/kg fermentable sugars
			Fermentation_out (dry)	kg	Mass yield (kg ethanol / kg dry ash-free biomass)	0.0422822
			Ethanol	0.0702477	Mass yield (%)	4.22822
			Unconverted sugars	0.00254784
			Cellulose	0.420721
			hemicellulose	0.484395
			Lignin	0.478
			TOTAL	1.45591	Kg ethanol /hr	0.0702477
					Litres ethanol /tonne dry ash-free biomass	53.5897
					Assumed ethanol density	0.789 kg/L

## Sheet: Non-extracted maize
		PT in	kg	1. PRETREATMENT General Maize_No Wax extraction
		Biomass	2.04	H20_in (kg)	Dry ash-free biomass total_in (kg)	Hemicellulose kg	Cellulose kg	Lignin kg
		Water	20	20.2475	1.69463	0.622404	0.584664	0.48756
General Maize composition:
Moisture (%):	12.13
Lignin Content (%):	23.9
Hemicellulose (%):	30.51			kg C6 out (PT liquor)	kg C5 out (PT liquor)
Cellulose (%):	28.66			0.0950781	0.0843878
Ash (%):	4.8
				Total sugars in PT liquor (kg):	0.179466
		PT out
		Liquor (wet)	16.44	Solid fraction mass balances (also hydrolysis input)	kg
		Solids (wet)	5.6	Cellulose	0.489586
				Hemicellulose	0.538016
				Lignin	0.48756
				Total unconverted biomass (dry)	1.51516
				water	3.98692
				Ash	0.09792
				TOTAL	5.6
				2. HYDROLYSIS General Maize_No Wax extraction
			Yield as reported by Processum is	0.03 - 0.06 kg sugars/kg as received feed. Dry matter is 80% of feed.
			Average Yield	0.045
			so assumed	0.03 kg C6 /kg and 0.015 kg C5/kg (as received feed), 0.038 kg C6 /kg and 0.019 kg C5/kg (dry feed)
			Hydrolysis_out (dry)	kg
			C6 sugars	0.0568186
			C5 sugars	0.0284093
			Cellulose	0.432767
			Hemicellulose	0.509607
			Lignin	0.48756
			TOTAL	1.51516
				3. FERMENTATION General Maize_No Wax extraction
			Yield as reported by Processum is	0.67-0.82 kg ethanol/kg fermentable sugars (maximum reported yield)
			Assumed	0.745 kg kg ethanol/kg fermentable sugars
			Fermentation_out (dry)	kg	Mass yield (kg ethanol / kg dry ash-free biomass)	0.0374683
			Ethanol	0.0634948	Mass yield (%)	3.74683
			Unconverted sugars	0.0217331
			Cellulose	0.432767
			hemicellulose	0.509607
			Lignin	0.48756
			TOTAL	1.51516	Kg ethanol /hr	0.0634948
					Litres ethanol / tonne dry ash-free biomass	47.4883
					Assumed ethanol density	0.789 kg/L
