# Supplementary material for: Supercritical extraction as an effective first-step in a maize stover biorefinery
Source: Royal Society of Chemistry journal article supplement (doi:10.1039/c5ra07485a), 2015-01-01
Supplement: c5ra07485a2.pdf [file c5ra07485a2.pdf]

## Supercritical extraction as an effective first-step in a maize stover biorefinery.

Thomas M. Attard, Elke Theeuwes , Leonardo D. Gomez , Emma Johansson , Ioanna Dimitriou, Phillip C. Wright, James H. Clark, Simon J. McQueen-Mason and Andrew J. Hunt.

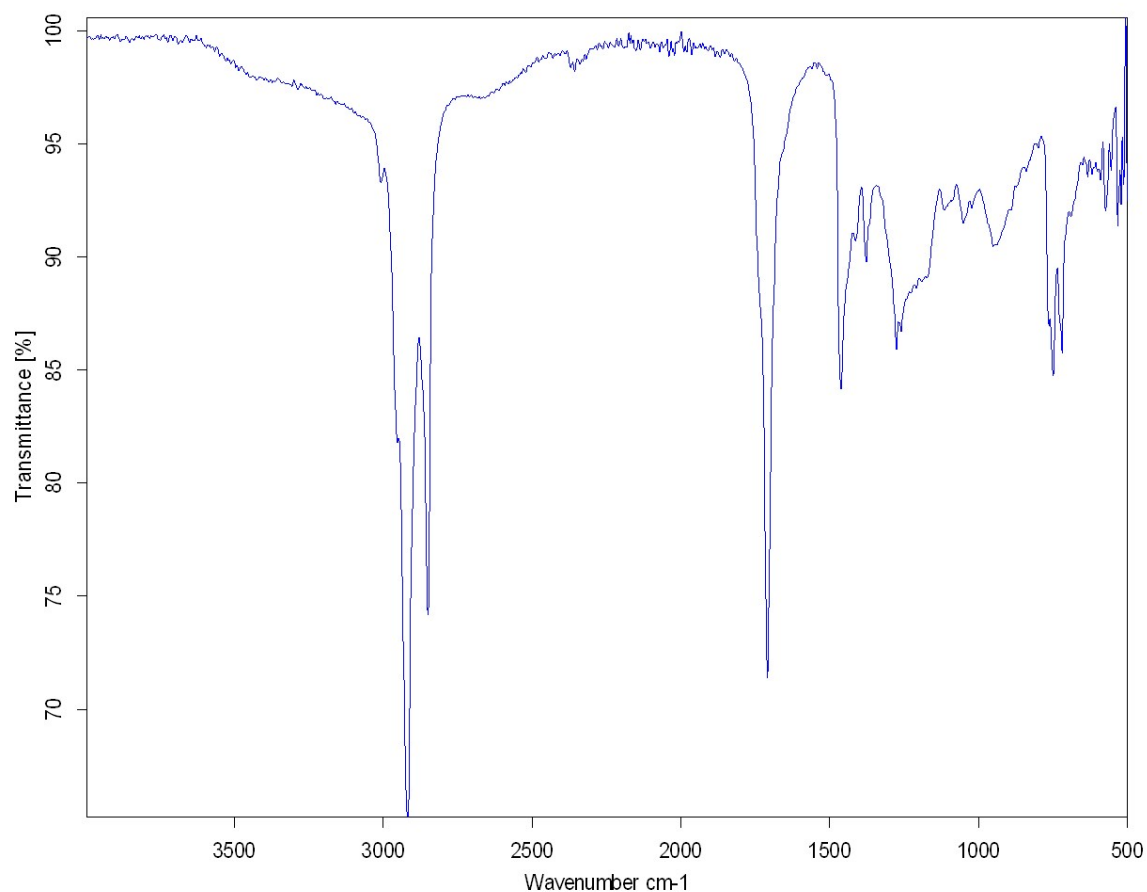

**Figure S1 IR data of Fraction C**

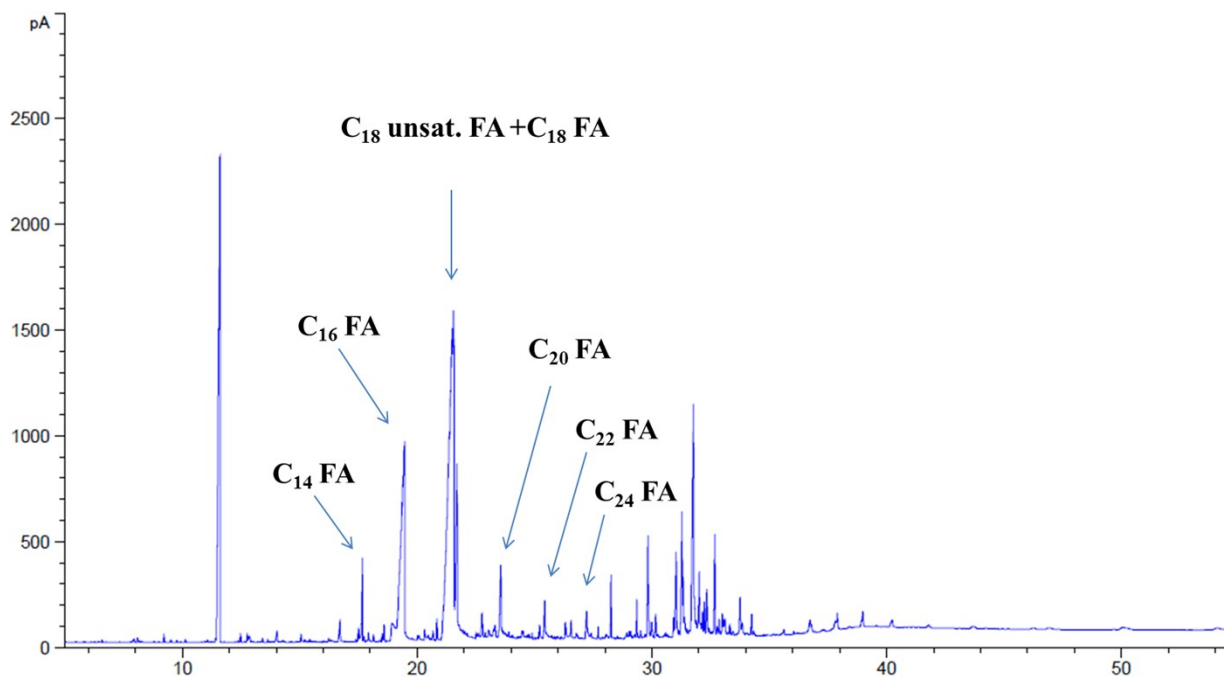

**Figure S2 GC chromatogram of underivatized wax FRACTION C (indicating some of the fatty acids (FA) identified)**

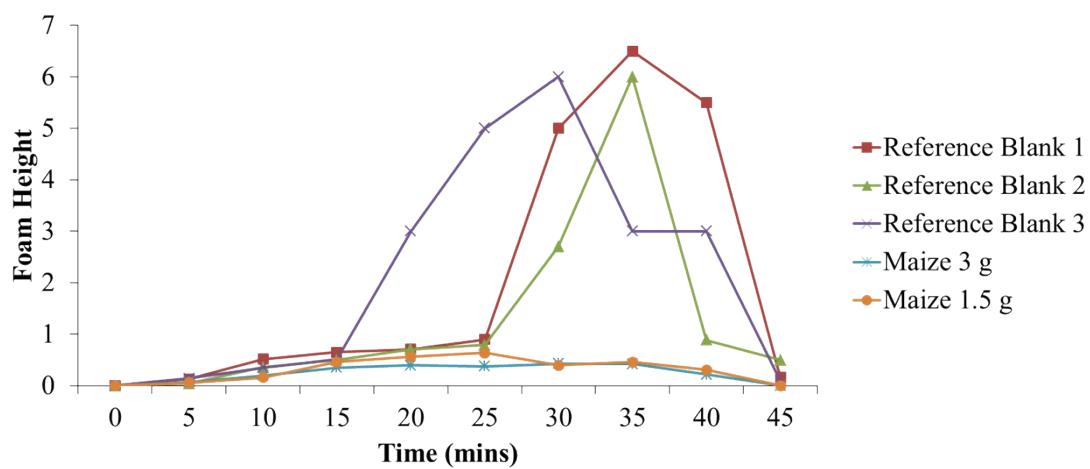

**Figure S3 Rough measurements of foam height during the washing machine run.**
